# Supplementary material for: Antifungal Activity of Decyl Gallate against Several Species of Pathogenic Fungi
Source: Hindawi journal article supplement (doi:10.1155/2014/506273), 2014-01-01

## Supplementary Material

Cell viability tested in MRC-5 and A549 after treatment with different concentrations of alkyl gallates. The red line represents the mean percentage of viable cell in the death control (DC). \* $p > 0.05$  not difference statistic in relation death control.

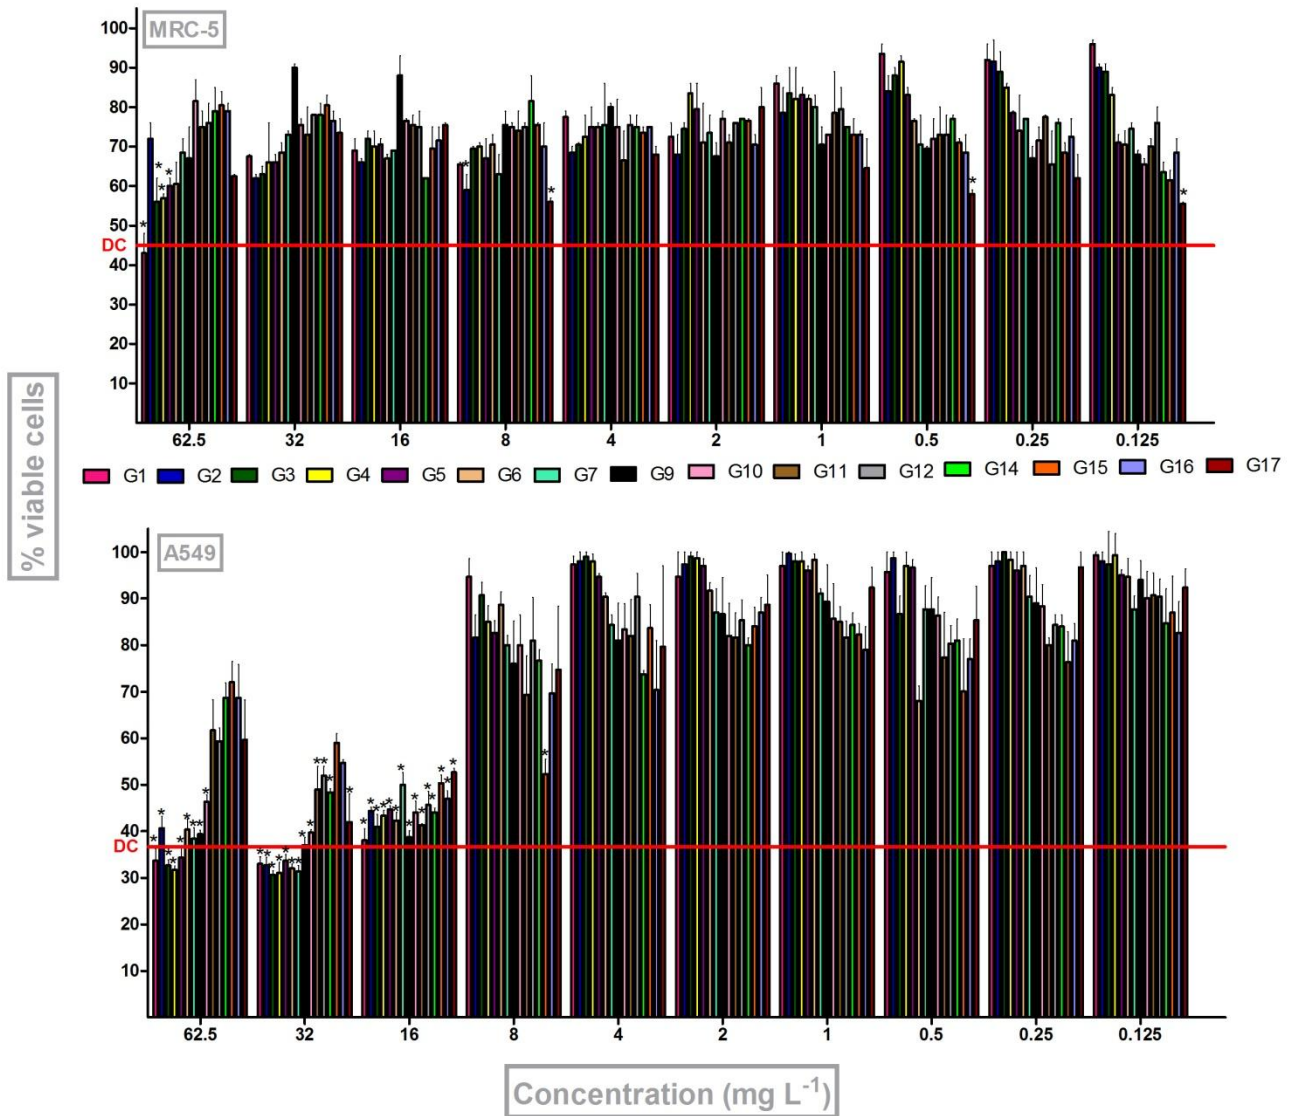

Supplement: f1 [file 506273.f1.pdf]
